# Supplementary material for: CHIP/STUB1 Ubiquitin Ligase Functions as a Negative Regulator of ErbB2 by Promoting Its Early Post-Biosynthesis Degradation
Source: MDPI journal article supplement (doi:10.3390/cancers13163936), 2021-08-04
Supplement: s1 [file s1]

*Supplementary Files*

# **CHIP/STUB1 Ubiquitin Ligase Functions as a Negative Regulator of ErbB2 by Promoting Its Early Post-Biosynthesis Degradation**

Haitao Luan, Tameka A. Bailey, Robert J. Clubb, Bhopal C. Mohapatra, Aaqib M. Bhat, Sukanya Chakraborty, Namista Islam, Insha Mushtaq, Matthew D. Storck, Srikumar M. Raja, Vimla Band and Hamid Band

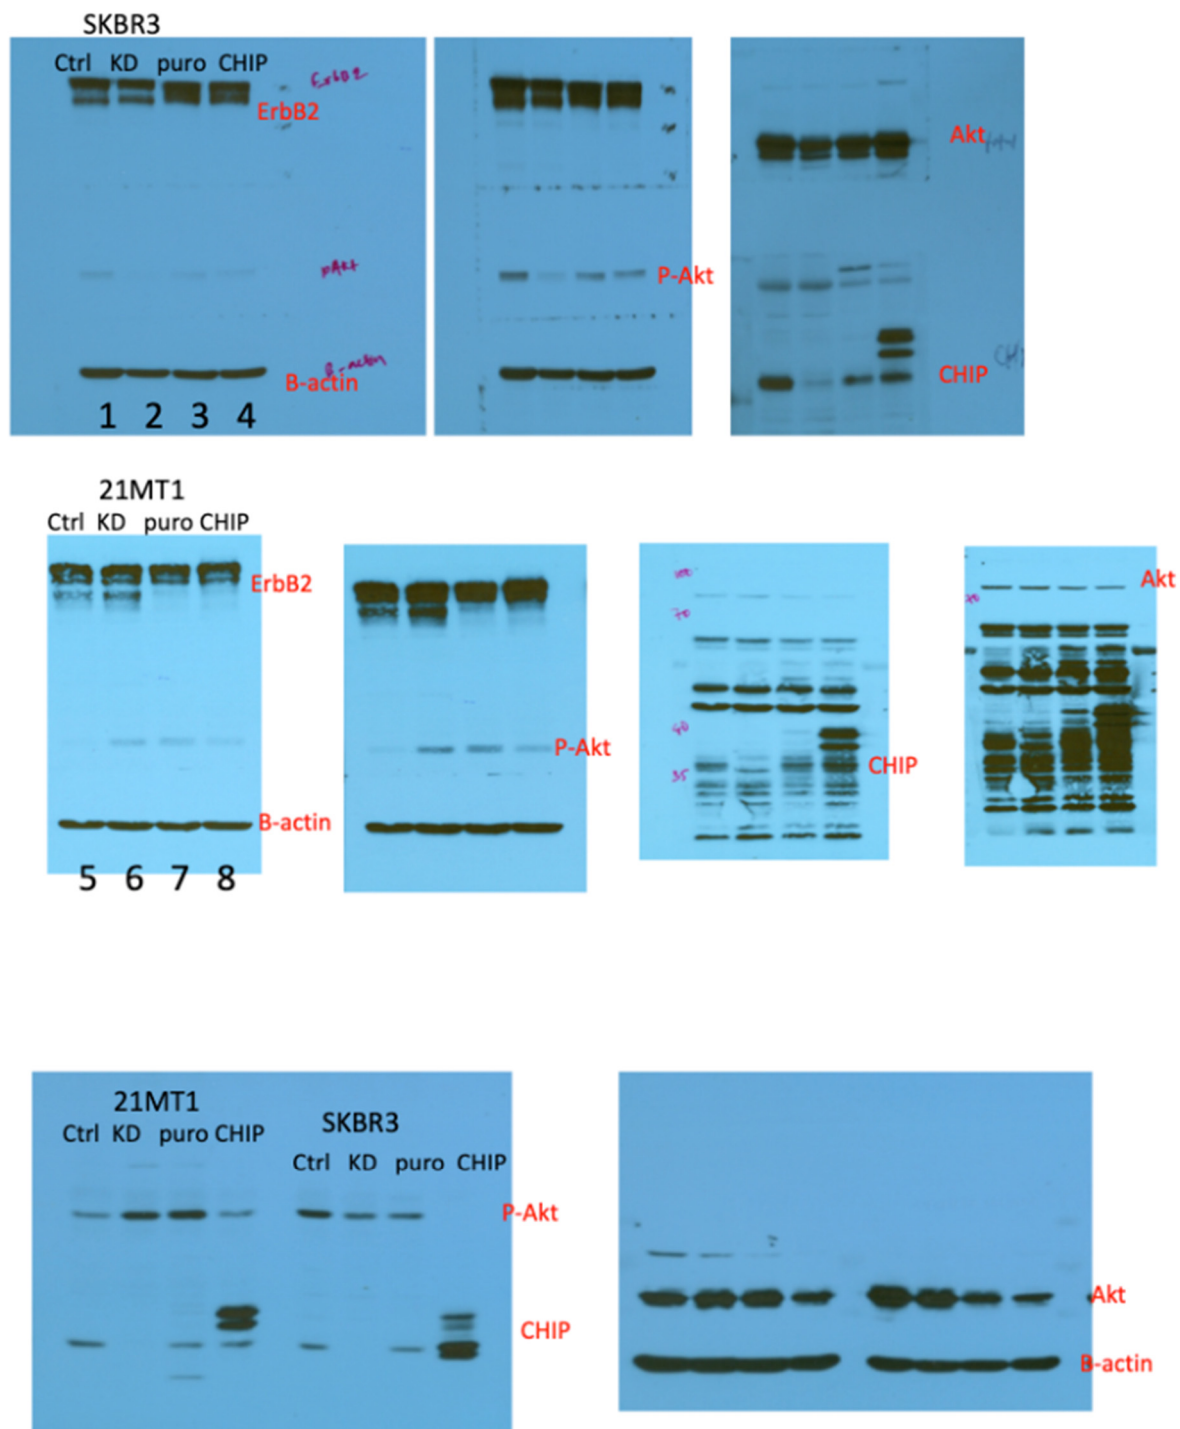

**Figure S1.** CHIP regulates cell surface ErbB2 levels. Original blots of western blot analysis of SKBR3 and 21MT1 cell lysate. 2. phospho-Akt and total Akt levels, and  $\beta$ -actin as a loading control.

(A)

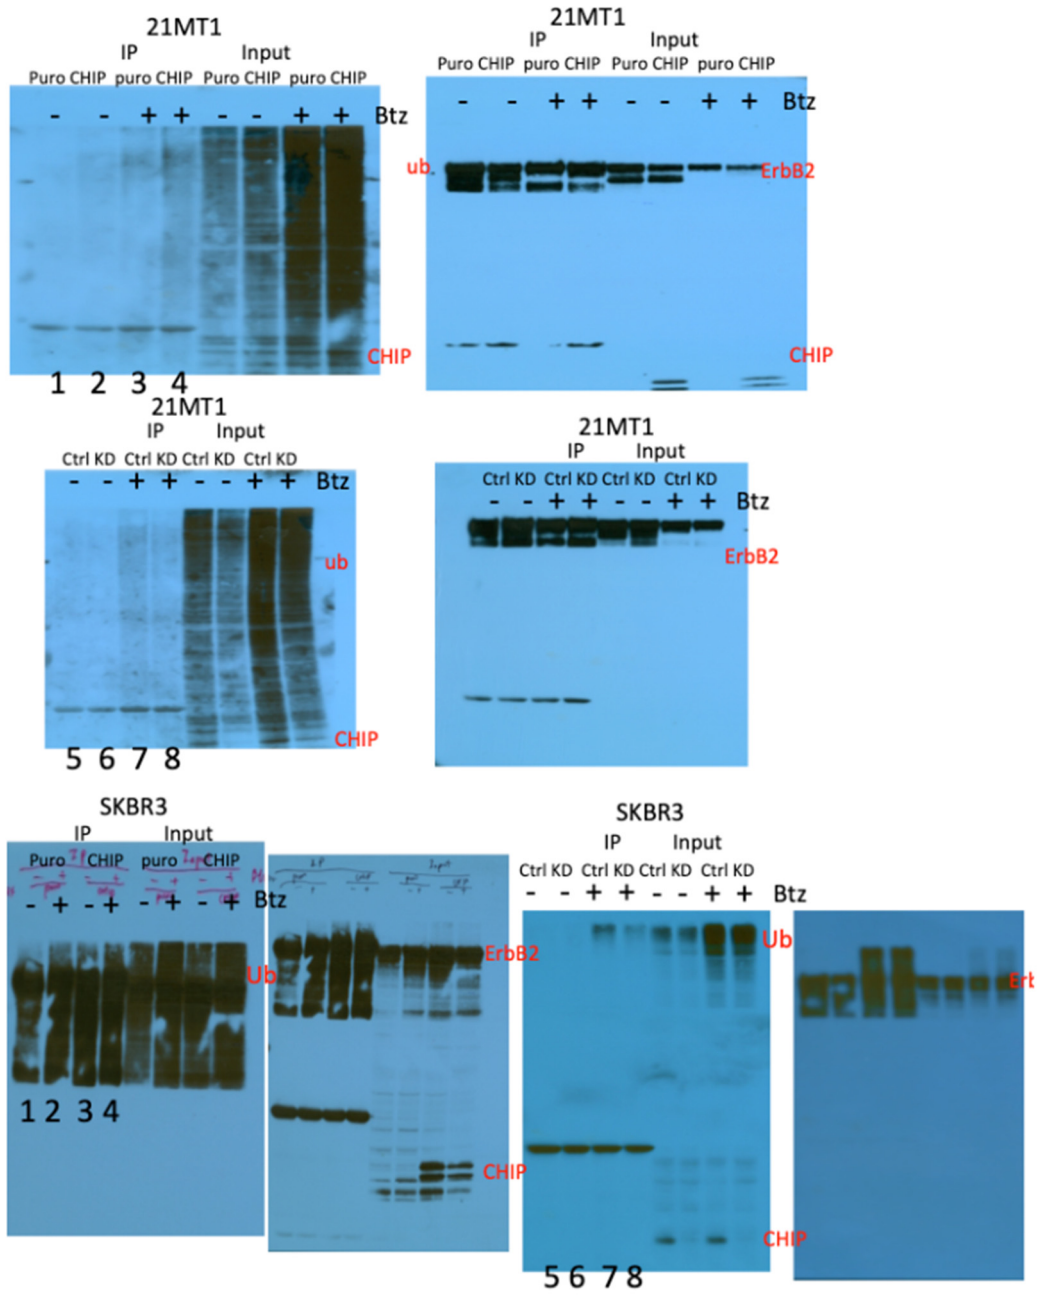

(B)

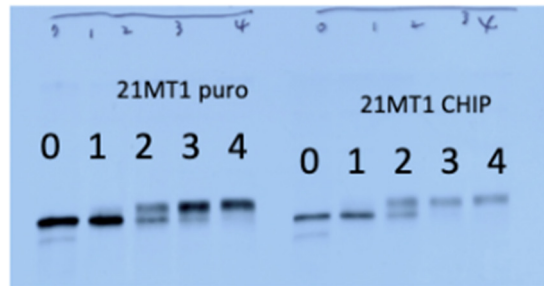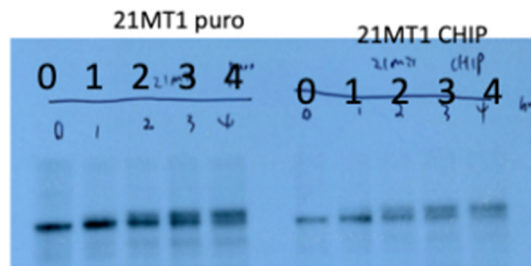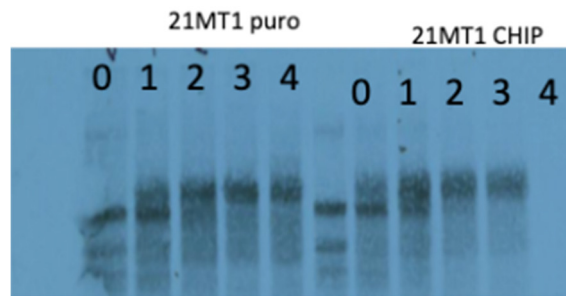

(C)

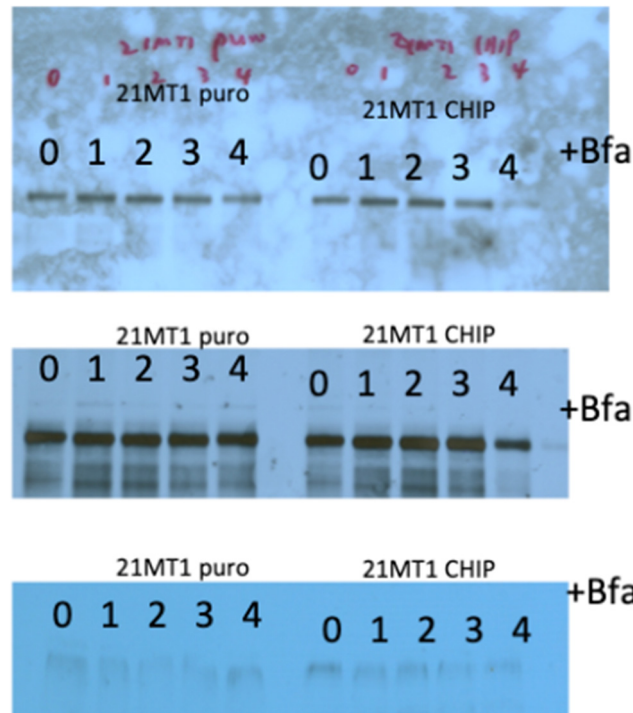

(D)

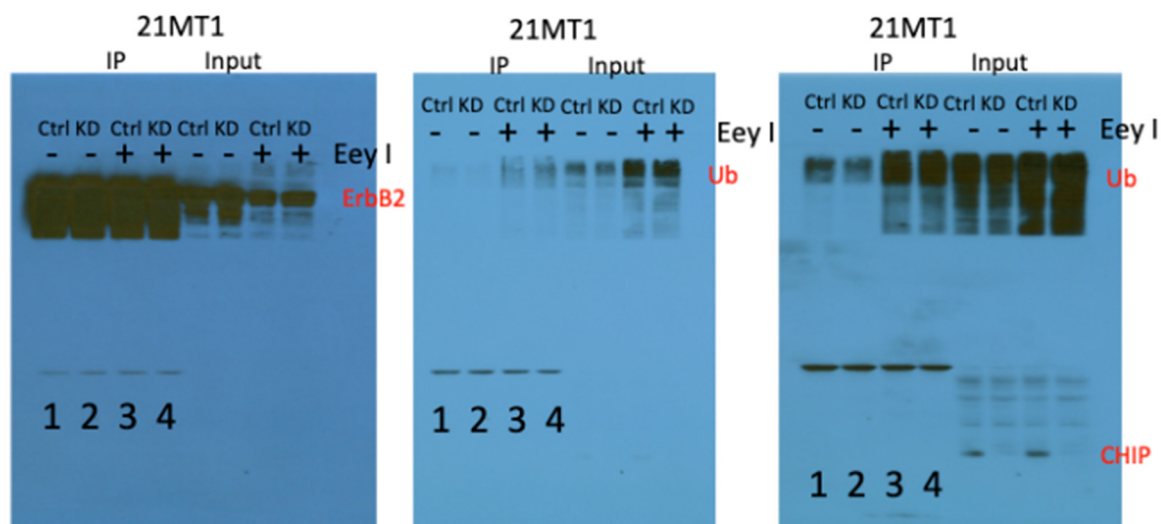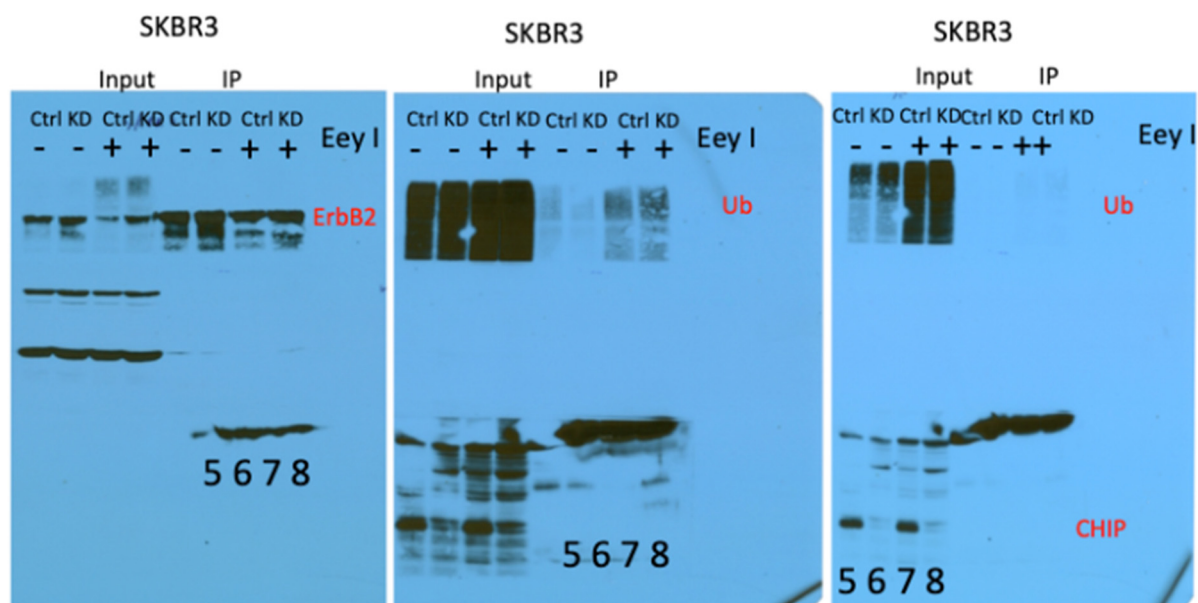

**Figure S2.** CHIP elevates the basal ubiquitination of ErbB2 during its maturation. (A) Original blots of immunoprecipitation of ErbB2 in 21MT1 and SKBR3 cells treated with Bortezomib (1  $\mu$ M) for 4h. (B) Original blots of [ $^{35}$ S]-methionine/cysteine chase of ErbB2 in 21MT1. (C) Original blots of [ $^{35}$ S]-methionine/cysteine chase of ErbB2 in 21MT1 with Brefeldin A (1  $\mu$ g/mL). (D) Original blots of immunoprecipitation of ErbB2 in 21MT1 and SKBR3 cells treated with Eeyarestatin I (1  $\mu$ M) for 4 h.

(A)

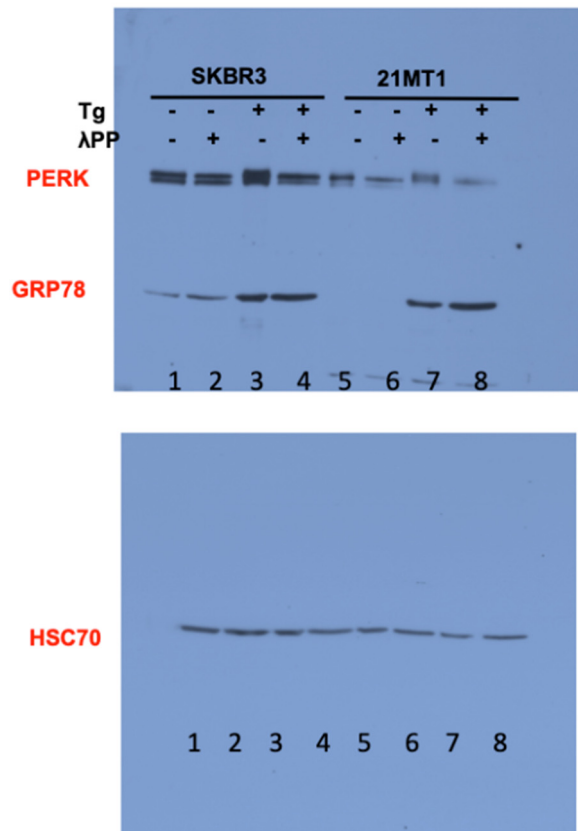

(B)



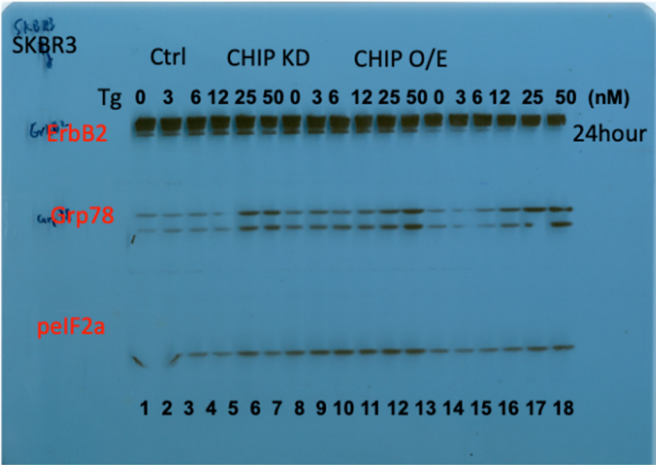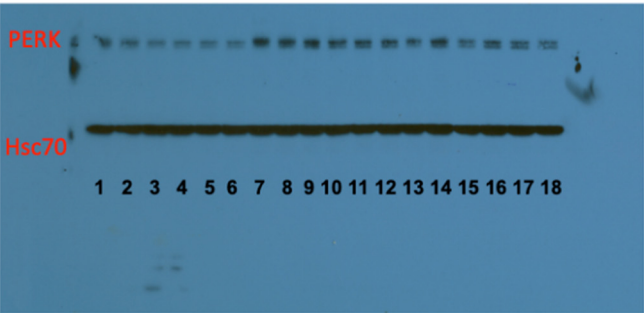

(C)

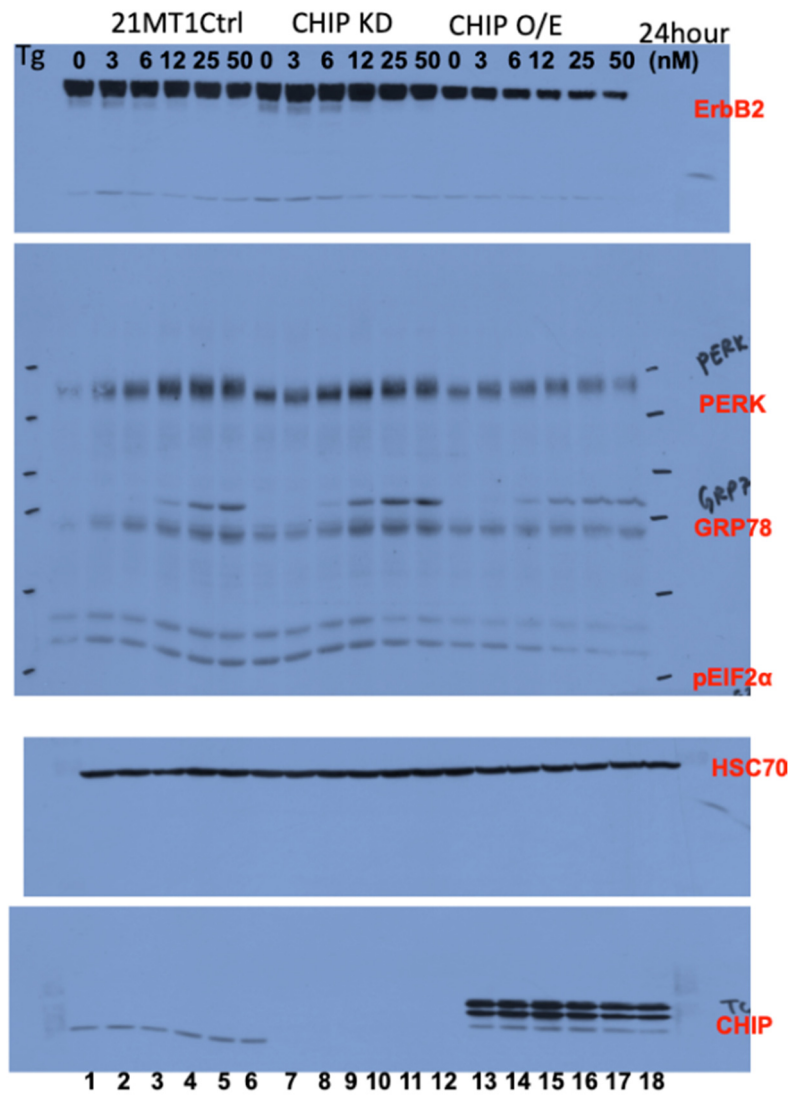

**Figure S3.** Reduced expression of CHIP sensitizes ErbB2-overexpressing breast cancer cell lines to ER stress. (A) Original blots of western blot analysis of SKBR3 and 21MT1 cell treated with thapsigargin (50 nM) for GRP78 and PERK. (B) Original blots of western blot analysis of SKBR3 cell with thapsigargin treatment for ER stress markers. (C) Original blots of western blot analysis of 21MT1 cell treated with thapsigargin for ER stress markers.



(A)

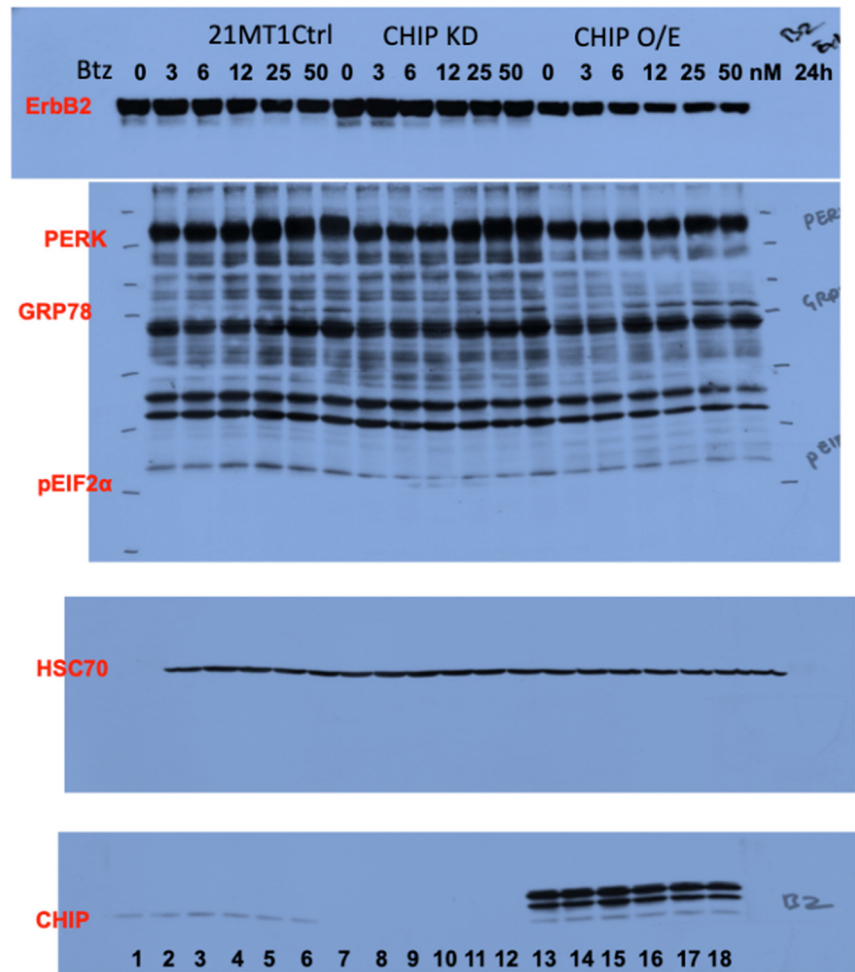

(B)

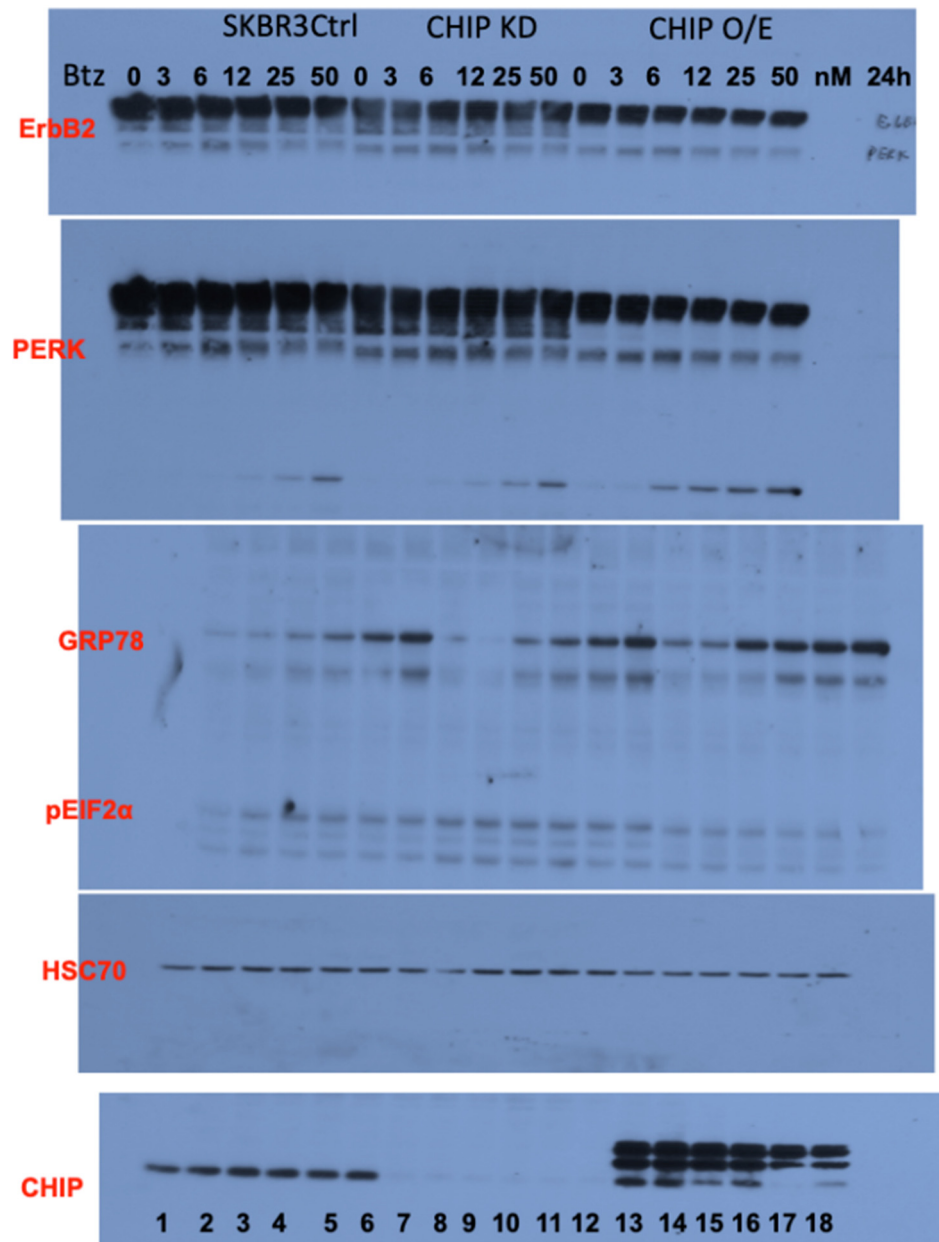

**Figure S4.** Bortezomib induces ER stress in ErbB2-overexpressing breast cancer cell lines. (A) Original blots of western blot analysis of 21MT1 cell treated with Bortezomib treatment for ER stress markers. (B) Original blots of western blot analysis of 21MT1 cell treated with Bortezomib treatment for ER stress markers.
